# Supplementary material for: Epigenetic dynamics of partially methylated domains in human placenta and trophoblast stem cells
Source: PubMed Central journal article supplement — BMC Genomics. 2024 Nov 6;25:1050. doi: 10.1186/s12864-024-10986-9 (PMC11542204; doi:10.1186/s12864-024-10986-9), 2024-11-06
Supplement: 12864_2024_10986_MOESM1_ESM.pdf [file 12864_2024_10986_MOESM1_ESM.pdf]

**Table S1. Summary in WGBS and ChIP-seq of hCTs and hTSCs**

| Cells and tissues                           |                                               | Sequenced reads (R1+R2) | Uniquely mapped reads |
|---------------------------------------------|-----------------------------------------------|-------------------------|-----------------------|
| <b>WGBS</b>                                 |                                               |                         |                       |
| first trimester hCTs (#1, male, 7 weeks)    |                                               | 1,918,276,290           | 690,113,287           |
| first trimester hCTs (#2, female, 7 weeks)  |                                               | 1,875,092,806           | 689,288,381           |
| term hCTs (#1, male)                        |                                               | 2,132,672,758           | 775,610,961           |
| term hCTs (#2, female)                      |                                               | 2,158,260,826           | 715,503,957           |
| hTSCs from hCTs (female, 6 weeks)           |                                               | 725,797,809             | 444,323,973           |
| hTSCs from trophectoderm (male)             |                                               | 636,290,805             | 383,680,848           |
| <b>ChIP-seq</b>                             |                                               |                         |                       |
|                                             | <b>Histone H3</b>                             |                         |                       |
| first trimester hCTs<br>(#1, male, 7 weeks) | K27ac                                         | 84,077,366              | 79,730,691            |
|                                             | K27me3                                        | 147,326,520             | 143,727,948           |
|                                             | K36me3                                        | 159,773,014             | 155,499,908           |
|                                             | K4me1                                         | 157,721,306             | 153,961,380           |
|                                             | K4me3                                         | 81,528,852              | 77,860,906            |
|                                             | K9me3                                         | 170,035,518             | 151,234,202           |
|                                             | Input                                         | 186,476,942             | 176,868,917           |
|                                             | first trimester hCTs<br>(#2, female, 7 weeks) | K27ac                   | 63,754,920            |
| K27me3                                      |                                               | 130,509,670             | 127,050,805           |
| K36me3                                      |                                               | 128,867,216             | 125,242,822           |
| K4me1                                       |                                               | 149,500,800             | 146,207,565           |
| K4me3                                       |                                               | 58,845,628              | 56,539,971            |
| K9me3                                       |                                               | 130,293,024             | 117,751,657           |
| Input                                       |                                               | 149,933,526             | 142,787,111           |
| term hCTs<br>(#1, male)                     |                                               | K27ac                   | 90,112,742            |
|                                             | K27me3                                        | 164,382,230             | 159,547,231           |
|                                             | K36me3                                        | 150,295,704             | 147,032,015           |
|                                             | K4me1                                         | 177,610,694             | 146,854,476           |
|                                             | K4me3                                         | 80,125,580              | 77,341,038            |
|                                             | K9me3                                         | 162,018,466             | 147,088,040           |
|                                             | Input                                         | 194,166,736             | 183,080,427           |
|                                             | term hCTs<br>(#2, female)                     | K27ac                   | 52,882,106            |
| K27me3                                      |                                               | 126,340,992             | 123,885,838           |
| K36me3                                      |                                               | 146,845,708             | 144,431,285           |
| K4me1                                       |                                               | 131,385,032             | 121,109,407           |
| K4me3                                       |                                               | 62,918,006              | 61,180,265            |
| K9me3                                       |                                               | 127,136,754             | 118,740,568           |
| Input                                       |                                               | 196,869,810             | 187,566,857           |
| hTSCs from hCTs<br>(female, 6 weeks)        |                                               | K27ac                   | 54,498,970            |
|                                             | K27me3                                        | 169,668,834             | 165,411,683           |
|                                             | K36me3                                        | 131,465,600             | 129,211,190           |
|                                             | K4me1                                         | 85,934,898              | 84,628,407            |
|                                             | K4me3                                         | 23,372,186              | 22,922,831            |
|                                             | K9me3                                         | 123,325,624             | 110,853,331           |
|                                             | Input                                         | 92,826,976              | 90,448,128            |
|                                             | hTSCs from trophectoderm<br>(male)            | K27ac                   | 81,058,968            |
| K27me3                                      |                                               | 156,416,844             | 153,113,354           |
| K36me3                                      |                                               | 118,461,142             | 116,872,586           |
| K4me1                                       |                                               | 126,647,556             | 124,712,619           |
| K4me3                                       |                                               | 36,625,228              | 35,832,861            |
| K9me3                                       |                                               | 132,055,826             | 117,839,884           |
| Input                                       |                                               | 136,953,104             | 132,844,046           |

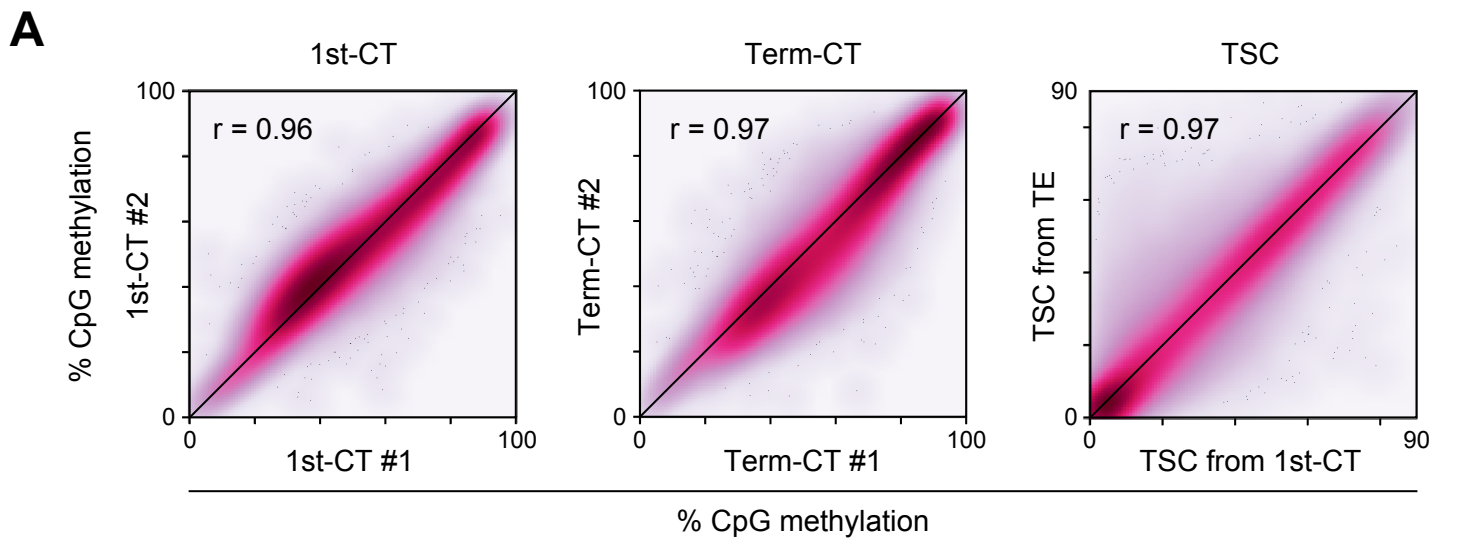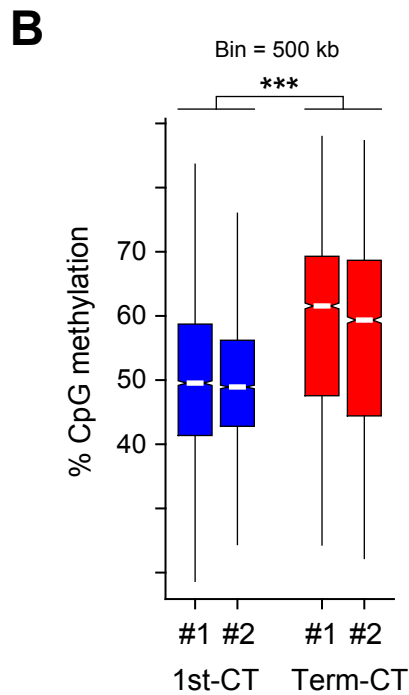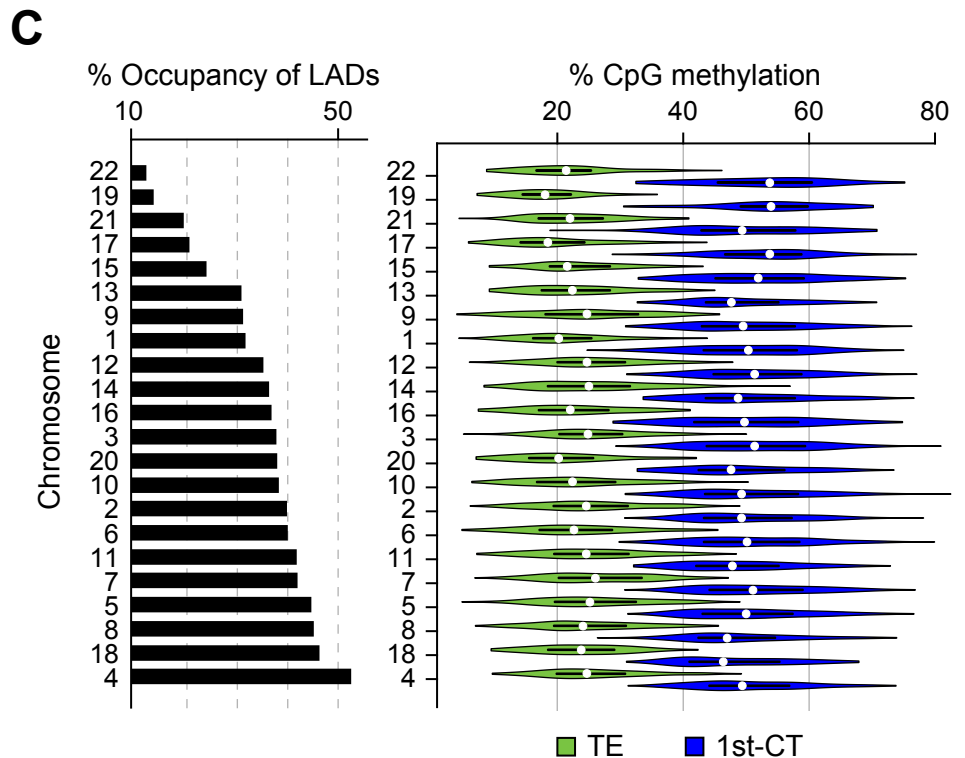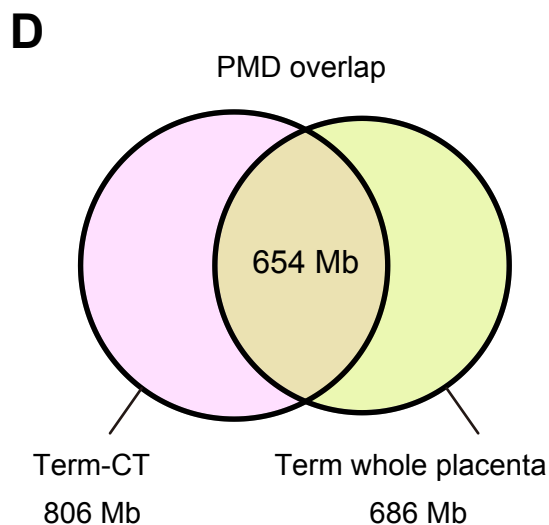

**Figure S1.**

**Dynamics of PMDs during human placental development.**

(A) Scatter plots comparing CpG methylation levels in 10-kb bins across replicates of each sample. 1st-CT, first trimester hCTs; Term-CT, term hCTs; TSC, hTSCs; TE, trophoctoderm.

(B) Comparison of global CpG methylation levels between first trimester and term hCTs.

(C) Correlation between position in the nucleus and DNA methylation levels. Bar plots show the LAD occupancy for each chromosome, ordered from top to bottom by decreasing LAD occupancy, with LAD data taken from Guelen et al. (2008) [33]. Violin plots compare the absolute methylation levels in trophoctoderm and first trimester hCTs for each chromosome.

(D) A Venn diagram showing the overlap between PMDs in term hCTs and those previous reported in term whole placentas. Data for term whole placentas are from Schroeder et al. (2013) [19].

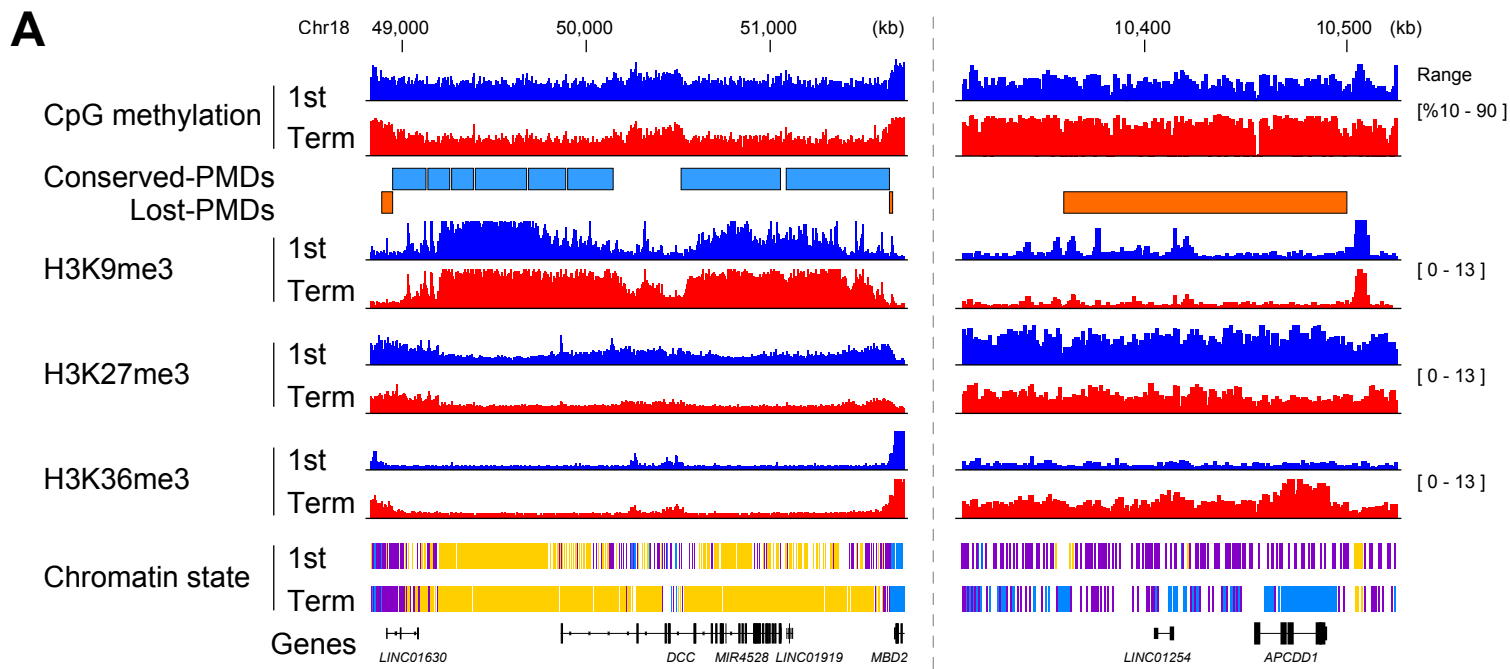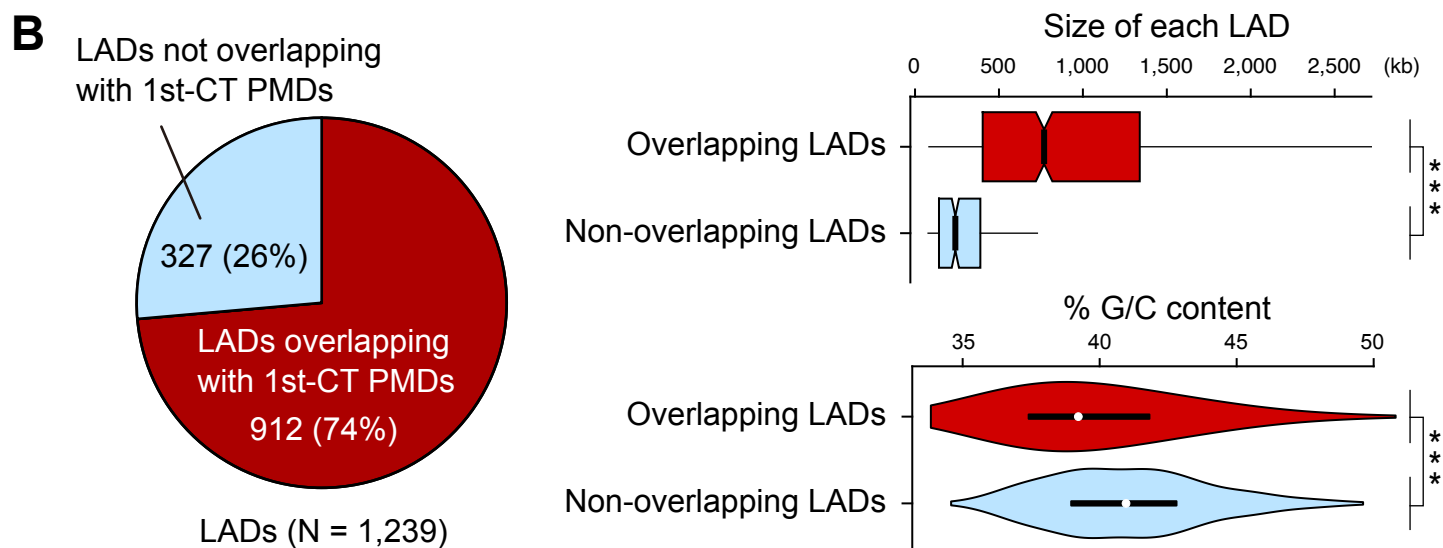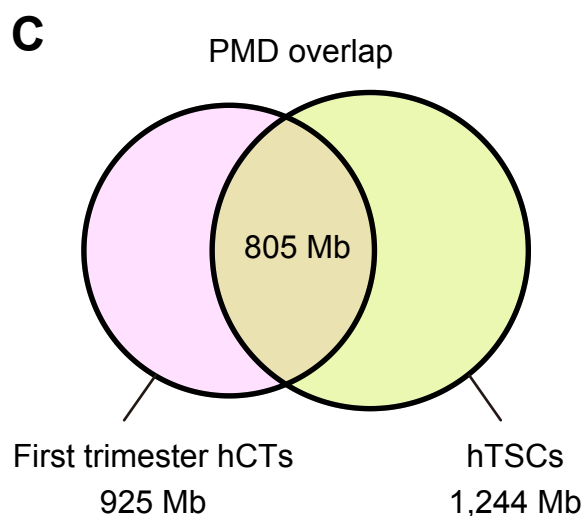

**Figure S2.**

**Characteristics of PMDs in human cytotrophoblasts.**

(A) A genome browser view of regions containing conserved-PMDs (left) and lost-PMDs (right). DNA methylation levels and histone H3 modification signals for first trimester hCTs and term hCTs are shown. Plots are provided for each histone H3 modification from one of the individual biological replicates, with PMDs marked as rectangles. Three chromatin states (H3K9me3, H3K27me3, H3K36me3) in ChromHMM were shown at the bottom. The color code for chromatin states is the same as in Figure 2A.

(B) Analysis of overlap of LADs with PMDs. The pie chart shows the proportion of LADs overlapping with PMDs in first trimester hCTs. Box plots show the size distribution of LADs that overlap and do not overlap with PMDs. Violin plots show the G/C content of LADs that overlap and do not overlap with PMDs. Statistical significance was assessed using the Wilcoxon rank sum test, with triple asterisks (\*\*\*) indicating  $P < 0.0001$ .

(C) A Venn diagram showing the overlap between PMDs in first trimester hCTs and those in hTSCs.
